# Supplementary material
Source: PubMed Central journal article supplement (PMC1606586)
Supplement: amjpathol_168_5_1666__1.pdf [file amjpathol_168_5_1666__1.pdf]

**Figure 1. Effect of galectins on lymphocyte apoptosis when gal3(+)/gal1(+) or gal3(-)/gal1(-).** Percentages of lymphocytes apoptosis in fields with (B) or without (A) the expression of gal-3 and gal-1.
