# Supplementary material
Source: PubMed Central journal article supplement (PMC1606586)

**A**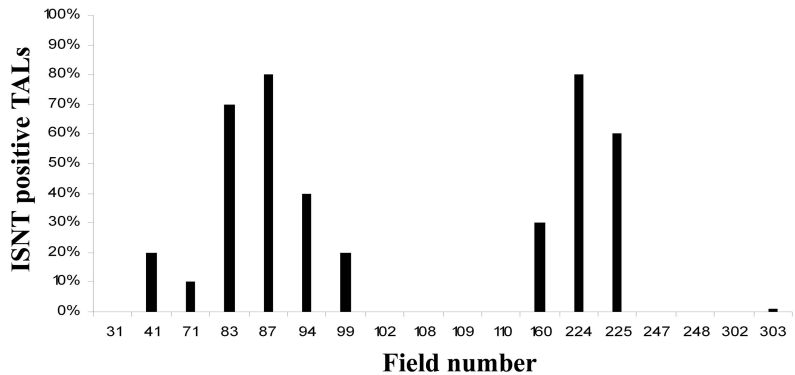**B**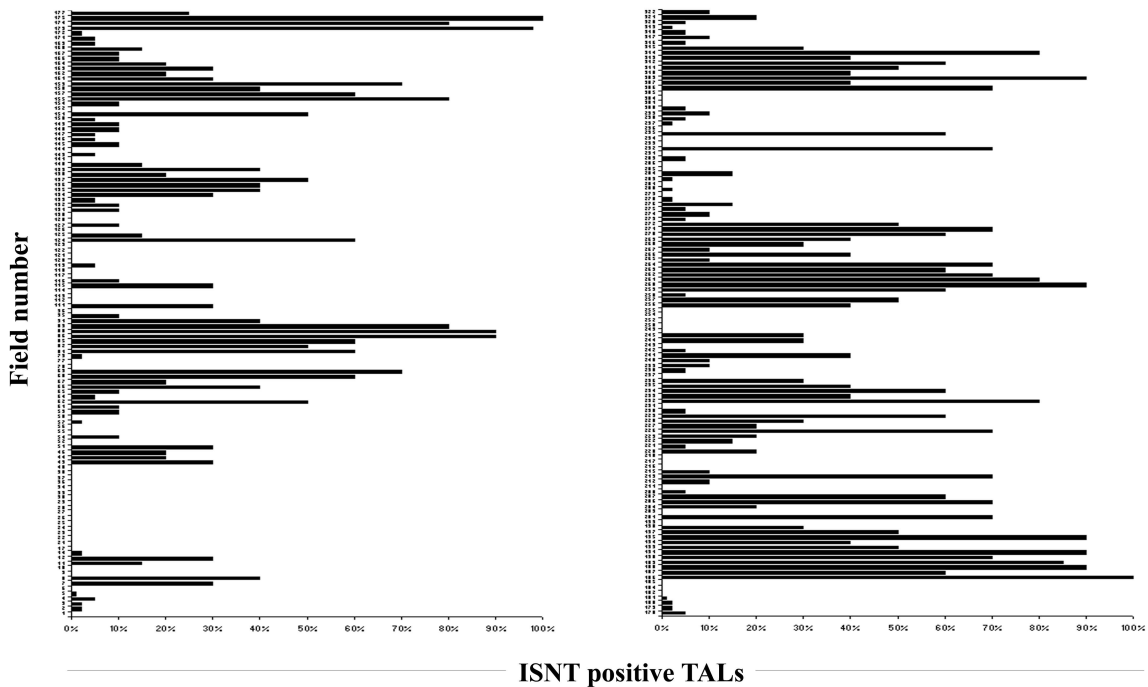

Supplement: amjpathol_168_5_1666__2.pdf [file amjpathol_168_5_1666__2.pdf]
